# Supplementary material for: First hepatitis E outbreak in Southeastern Senegal
Source: PubMed Central journal article supplement (PMC9596447; doi:10.1038/s41598-022-22491-8), 2022-10-25

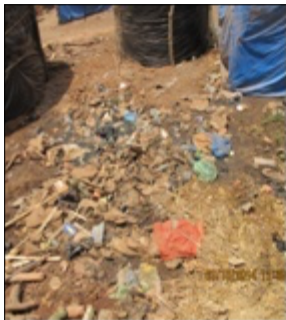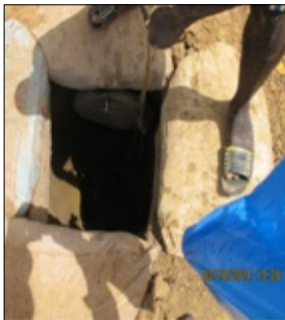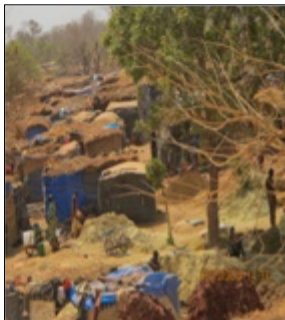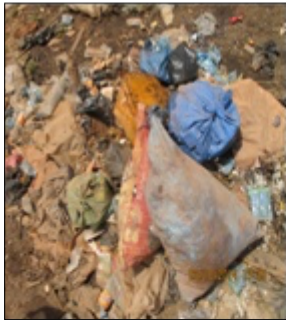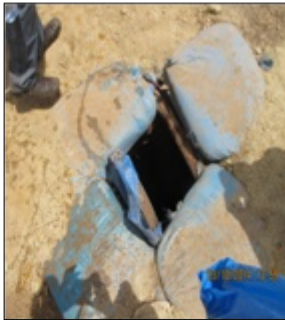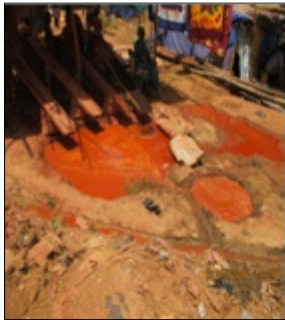

Supplement: 41598_2022_22491_MOESM2_ESM.pdf [file 41598_2022_22491_MOESM2_ESM.pdf]
